# Supplementary material
Source: PubMed Central journal article supplement (PMC7164815)

# THE LANCET

## Respiratory Medicine

### Supplementary appendix

This appendix formed part of the original submission and has been peer reviewed. We post it as supplied by the authors.

Supplement to: Brendish NJ, Malachira AK, Armstrong L, et al. Routine molecular point-of-care testing for respiratory viruses in adults presenting to hospital with acute respiratory illness (ResPOC): a pragmatic, open-label, randomised controlled trial. *Lancet Respir Med* 2017; published online April 5. [http://dx.doi.org/10.1016/2213-2600\(17\)30120-0](http://dx.doi.org/10.1016/2213-2600(17)30120-0).

**Table S1: List of final clinical diagnoses in ‘Other’ category**

|                                      | <b>POCT<br/>(n=47)</b> | <b>Control<br/>(n=47)</b> |
|--------------------------------------|------------------------|---------------------------|
| Congestive cardiac failure           | 10                     | 9                         |
| Exacerbation of other lung diseases* | 9                      | 12                        |
| Tonsillopharyngitis                  | 6                      | 1                         |
| Pulmonary embolism                   | 3                      | 6                         |
| Pleural effusion                     | 3                      | 0                         |
| Urinary sepsis                       | 3                      | 2                         |
| Gastroenteritis                      | 3                      | 0                         |
| Musculoskeletal chest pain           | 2                      | 1                         |
| Empyema                              | 1                      | 1                         |
| Anaemia                              | 1                      | 0                         |
| Infected spinal metal work           | 1                      | 0                         |
| Infectious mononucleosis             | 1                      | 1                         |
| Lymphoma                             | 1                      | 0                         |
| Pericarditis                         | 1                      | 0                         |
| Atrial fibrillation                  | 1                      | 0                         |
| Pyogenic liver abscess               | 1                      | 0                         |
| Sepsis/bacteraemia of unknown source | 0                      | 4                         |
| Viral meningitis                     | 0                      | 2                         |
| Sinusitis                            | 0                      | 1                         |
| Tuberculosis                         | 0                      | 1                         |
| Acute cholecystitis                  | 0                      | 1                         |
| Haemarthrosis                        | 0                      | 1                         |
| Inflammatory bowel disease           | 0                      | 1                         |
| Lobar collapse unclear aetiology     | 0                      | 1                         |
| Transverse myelitis                  | 0                      | 1                         |
| Diabetic ketoacidosis                | 0                      | 1                         |

POCT=point-of-care test group.

\*Includes bronchiectasis and interstitial lung diseases

**Table S2: Percentage positive and negative agreement between FilmArray respiratory panel (POCT) and Laboratory PCR results for all patients in the intervention group who received both tests (n=110)**

|                   | Number detected by FilmArray/ Laboratory PCR* |           |           |           | Positive % agreement [a/(a+c)] (95%CI) | Negative % agreement [d/(b+d)] (95%CI) |
|-------------------|-----------------------------------------------|-----------|-----------|-----------|----------------------------------------|----------------------------------------|
|                   | + /+ (a)                                      | + / - (b) | - / + (c) | - / - (d) |                                        |                                        |
| Influenza A       | 19                                            | 2         | 2         | 87        | 90% (70 to 99)                         | 98 (92 to 100)                         |
| Influenza B       | 11                                            | 1         | 1         | 97        | 92% (61 to 100)                        | 99 (94 to 100)                         |
| RSV               | 2                                             | 0         | 0         | 108       | 100 (16 to 100)                        | 100 (97 to 100)                        |
| Parainfluenza 3   | 2                                             | 0         | 0         | 108       | 100 (16 to 100)                        | 100 (97 to 100)                        |
| hMPV              | 3                                             | 0         | 0         | 107       | 100 (30 to 100)                        | 100 (97 to 100)                        |
| Adenovirus        | 1                                             | 0         | 0         | 109       | 100 (30 to 100)                        | 100 (97 to 100)                        |
| Rhino/enterovirus | NA                                            | 12        | NA        | NA        | -                                      | -                                      |
| Coronavirus       | NA                                            | 5         | NA        | NA        | -                                      | -                                      |
| Total             | 38                                            | 3         | 3         | 66        | 93 (80 to 98)                          | 96 (88 to 99)                          |

PCR=polymerase chain reaction. 95%CI=95% confidence interval. RSV=respiratory syncytial virus. hMPV=human metapneumovirus. NA=not applicable; rhino/enterovirus and coronavirus were not targets on the laboratory PCR panel.

\*Includes all viruses detected by laboratory PCR with Ct value of  $\leq 38$  of 45 cycles.

**Table S3: Multivariable analysis for the primary outcome, receipt of any antibiotics**

| Variable                                         | Odds ratio<br>(95% CI) | p value |
|--------------------------------------------------|------------------------|---------|
| Point-of-care test                               | 0.99 (0.57 to 1.70)    | 0.957   |
| Age, years                                       | 1.03 (1.01 to 1.05)    | 0.001   |
| Duration of symptoms<br>prior to admission, days | 0.96 (0.83 to 1.11)    | 0.579   |
| Temperature, °C                                  | 1.34 (0.97 to 1.84)    | 0.073   |
| Sex: male                                        | 0.71 (0.40 to 1.25)    | 0.235   |
| Antibiotics <14 days prior*                      | 1.54 (0.79 to 3.01)    | 0.204   |
| Cardiovascular disease*                          | 0.58 (0.27 to 1.23)    | 0.158   |
| Respiratory disease*                             | 2.25 (0.97 to 5.20)    | 0.059   |
| Other comorbidity*                               | 2.70 (1.17 to 6.25)    | 0.059   |
| Current smoker*                                  | 1.11 (0.57 to 2.19)    | 0.755   |
| Influenza vaccine*†                              | 0.79 (0.42 to 1.48)    | 0.468   |
| CRP, mg/L                                        | 1.02 (1.01 to 1.02)    | <0.001  |
| Diagnosis**                                      |                        |         |
| Asthma                                           | 0.15 (0.04 to 0.54)    | 0.004   |
| IECOPD                                           | 0.31 (0.08 to 1.25)    | 0.101   |
| ILI/NPLRTI                                       | 0.16 (0.05 to 0.49)    | 0.001   |
| Other                                            | 0.20 (0.06 to 0.70)    | 0.012   |

All continuous variables are mean-centred.

95% CI=95% confidence interval. CRP=C-reactive protein.

IECOPD=infective exacerbation of COPD.

ILI=influenza-like illness.

NPLRTI=non-pneumonic lower respiratory tract infection

\*Reference category: no.

\*\*Reference category: pneumonia.

†For the current influenza season

**Table S4: Multivariable analysis for the duration of antibiotics**

| <b>Variable</b>                               | <b>Incidence rate ratio<br/>(95% CI)</b> | <b>p value</b> |
|-----------------------------------------------|------------------------------------------|----------------|
| Point-of-care test                            | 0.92 (0.83 to 1.02)                      | 0.119          |
| Age, years                                    | 1.00 (1.00 to 1.00)                      | 0.979          |
| Duration of symptoms prior to admission, days | 1.00 (0.97 to 1.030)                     | 0.980          |
| Temperature, °C                               | 0.99 (0.94 to 1.04)                      | 0.683          |
| Sex: male                                     | 1.02 (0.92 to 1.13)                      | 0.737          |
| Antibiotics <14 days prior*                   | 1.05 (0.93 to 1.19)                      | 0.413          |
| Cardiovascular disease*                       | 0.97 (0.85 to 1.10)                      | 0.614          |
| Respiratory disease*                          | 1.04 (0.92 to 1.19)                      | 0.497          |
| Other comorbidity*                            | 1.03 (0.91 to 1.16)                      | 0.674          |
| Current smoker*                               | 0.96 (0.85 to 1.09)                      | 0.523          |
| Influenza vaccine*†                           | 1.00 (0.89 to 1.13)                      | 0.952          |
| CPR, mg/L                                     | 1.00 (1.00 to 1.00)                      | <0.001         |
| Diagnosis**                                   |                                          |                |
| Asthma                                        | 0.52 (0.42 to 0.64)                      | <0.001         |
| IECOPD                                        | 0.83 (0.71 to 0.98)                      | 0.025          |
| ILI/NPLRTI                                    | 0.69 (0.59 to 0.81)                      | <0.001         |
| Other                                         | 0.99 (0.84 to 1.16)                      | 0.873          |

All continuous variables are mean-centred.  
95% CI=95% confidence interval. CRP=C-reactive protein.  
IECOPD=infective exacerbation of COPD.  
ILI=influenza-like illness.  
NPLRTI=non-pneumonic lower respiratory tract infection  
\*Reference category: no.  
\*\*Reference category: pneumonia.  
†For the current influenza season

**Table S5: Post-hoc analysis showing baseline characteristics in patients not prescribed antibiotics prior to randomisation and POCT result availability**

|                        | <b>POCT<br/>(n=120)</b> | <b>Control<br/>(n=167)</b> | <b>p value</b> |
|------------------------|-------------------------|----------------------------|----------------|
| Age, years             | 54 (33-71)              | 57 (40-70)                 | 0.48           |
| Female sex             | 68 (57%)                | 82 (49%)                   | 0.23           |
| <b>Co-morbidity</b>    |                         |                            |                |
| CVD                    | 36 (30%)                | 52 (31%)                   | 0.90           |
| Respiratory disease    | 72 (60%)                | 93 (56%)                   | 0.47           |
| Renal disease          | 3 (3%)                  | 6 (4%)                     | 0.74           |
| Liver disease          | 4 (3%)                  | 2 (1%)                     | 0.24           |
| Diabetes               | 17 (14%)                | 20 (12%)                   | 0.60           |
| Cancer                 | 8 (7%)                  | 9 (5%)                     | 0.80           |
| <b>Observations</b>    |                         |                            |                |
| Temperature, °C        | 36.8 (36.2-37.3)        | 36.6 (36.3-37.3)           | 0.65           |
| CRP, mg/L              | 23 (4-76)               | 28 (8-86)                  | 0.38           |
| <b>Final diagnosis</b> |                         |                            |                |
| Asthma                 | 31 (26%)                | 32 (19%)                   | 0.20           |
| IECOPD                 | 22 (18%)                | 40 (24%)                   | 0.31           |
| Pneumonia              | 20 (17%)                | 31 (19%)                   | 0.76           |
| ILI/NPLRTI             | 31 (26%)                | 37 (22%)                   | 0.49           |
| Other                  | 16 (13%)                | 27 (16%)                   | 0.62           |

All data are given as number (%), or median (IQR).

POCT=Point-of-care test group. CVD=cardiovascular disease.

CRP=C-reactive protein. IECOPD=infective exacerbation of COPD.

ILI=influenza-like illness. NPLRTI=non pneumonic lower respiratory tract infection.

**Table S6: Post-hoc analysis showing antibiotic use in patients not prescribed antibiotics prior to randomisation and POCT result availability.**

|                           | <b>POCT<br/>(n=120)</b> | <b>Control<br/>(n=167)</b> | <b>Difference<br/>(95% CI)</b> | <b>Odds ratio<br/>(95% CI)</b> | <b>NNT<br/>(95% CI)</b> | <b>p value</b> |
|---------------------------|-------------------------|----------------------------|--------------------------------|--------------------------------|-------------------------|----------------|
| Any antibiotic prescribed | 61/120 (51%)            | 107/167 (64%)              | -13.2% (-24.8 to -1.7)         | 0.58 (0.36 to 0.93)            | 8 (4 to 59)             | 0.0289         |
| Single dose only          | 2/61 (3)                | 0/107 (0)                  | 3.3% (-1.8 to 12.4)            | 9.0 (0.4 to 191.4)             | -                       | 0.14           |
| <48 hours in total        | 9/61 (15)               | 3/107 (3)                  | 12.0% (3.5 to 23.0)            | 6.0 (1.6 to 23.1)              | -                       | 0.0092         |
| <b>Duration, days</b>     |                         |                            |                                |                                |                         |                |
| mean (SD)                 | 8.0 (6.0)               | 8.7 (5.1)                  | -0.7 (-2.5 to 1.2)             | -                              | -                       | 0.48           |
| median (IQR)              | 6.5 (5.5-9.8)           | 7.1 (5.9-9.8)              | -0.5 (-1.5 to 0.4)             | -                              | -                       | 0.28           |

All data are given as number (%), n/n (%), mean (SD) or median (IQR). POCT=Point-of-care test group. 95% CI=95% confidence interval. NNT=number needed to test.

**Table S7. Post-hoc analysis showing antibiotic duration and length of hospital stay by POCT result**

|                       | <b>POCT<br/>positive<br/>(n=158)</b> | <b>POCT<br/>negative<br/>(n=202)</b> | <b>Difference<br/>95%CI</b> | <b>Odds ratio<br/>95%CI</b> | <b>p value</b> |
|-----------------------|--------------------------------------|--------------------------------------|-----------------------------|-----------------------------|----------------|
| <b>Antibiotic use</b> |                                      |                                      |                             |                             |                |
| Any antibiotic given  | 129 (80%)                            | 172 (85%)                            | -5.4% (-13.3 to 2.5)        | 0.73 (0.41 to 1.27)         | 0.21           |
| Duration, days        |                                      |                                      |                             |                             |                |
| mean (SD)             | 6.2 (4.8)                            | 8.0 (5.3)                            | -1.7 (-2.9 to -0.6)         | -                           | 0.0033         |
| median (IQR)          | 6.5 (2.1-8.2)                        | 7.0 (5.7-9.2)                        | -0.5 (-1.8 to -0.2)         | -                           | 0.0010         |
| <b>Length of stay</b> |                                      |                                      |                             |                             |                |
| Hospitalised          | 142 (90%)                            | 190 (94%)                            | -4.2 (-9.7 to 1.3)          | 0.56 (0.26 to 1.22)         | 0.17           |
| Length of stay, days§ |                                      |                                      |                             |                             |                |
| mean (SD)             | 4.7 (4.6)                            | 6.5 (7.2)                            | -1.7 (-3.0 to -0.4)         | -                           | 0.0085         |
| median (IQR)          | 3.1 (1.3-6.7)                        | 4.0 (1.9-7.1)                        | -0.9 (-1.3 to 0.1)          | -                           | 0.059          |

Data are given as number (%), mean (standard deviation) and median (interquartile range).

†POCT negative compared with control group

§Adjusted for in hospital mortality

**Table S8: Antibiotic use and length of stay for the clinical subgroups**

|                                 | <b>POCT<br/>(n=360)</b> | <b>Control<br/>(n=354)</b> | <b>Difference<br/>(95%CI)</b> | <b>Odds ratio<br/>(95%CI)</b> | <b>p value</b> |
|---------------------------------|-------------------------|----------------------------|-------------------------------|-------------------------------|----------------|
| <b>Asthma</b>                   | 62                      | 57                         |                               |                               |                |
| Antibiotics given               | 43 (69.4%)              | 36 (63.2%)                 | 6.2% (-10.5 to 22.6)          | 1.32 (0.62 to 2.83)           | 0.56           |
| Single dose only                | 14/43 (32.6%)           | 3/36 (8.3%)                | 24.2% (6.1 to 40.1)           | 5.31 (1.38 to 20.41)          | 0.0125         |
| <48hrs given                    | 18/43 (41.9%)           | 4/36 (11.1%)               | 30.8% (11.2 to 47.0)          | 5.76 (1.73 to 19.20)          | 0.0026         |
| Duration of antibiotics, days   |                         |                            |                               |                               |                |
| mean (SD)                       | 3.9 (3.4)               | 5.3 (2.3)                  | -1.4 (-2.7 to -0.1)           | -                             | 0.0382         |
| median (IQR)                    | 5.5 (0.1-6.7)           | 6.0 (5.0-6.7)              | -0.5 (-2.5 to 0.1)            | -                             | 0.0492         |
| Length of hospital stay, days   |                         |                            |                               |                               |                |
| mean (SD)                       | 3.4 (3.3)               | 3.9 (3.5)                  | -0.5 (-1.8 to 0.9)            | -                             | 0.49           |
| median (IQR)                    | 2.4 (1.3-4.9)           | 2.8 (1.6-6.0)              | -0.4 (-1.3 to 0.5)            | -                             | 0.51           |
| <b>IECOPD</b>                   | 81                      | 83                         |                               |                               |                |
| Antibiotics given               | 75 (92.6%)              | 75 (90.4%)                 | 2.2% (-6.9 to 11.4)           | 1.33 (0.44 to 4.03)           | 0.78           |
| Single dose only                | 7/75 (9.3%)             | 3/75 (4.0%)                | 5.3% (-3.2 to 14.4)           | 2.47 (0.61 to 9.95)           | 0.33           |
| <48hrs given                    | 11/75 (14.7%)           | 3/75 (4.0%)                | 10.7% (1.2 to 20.7)           | 4.13 (1.10 to 15.50)          | 0.0462         |
| Duration of antibiotics, days   |                         |                            |                               |                               |                |
| mean (SD)                       | 6.1 (3.2)               | 8.0 (5.0)                  | -1.9 (-3.2 to -0.5)           | -                             | 0.0078         |
| median (IQR)                    | 6.4 (5.3-7.6)           | 6.5 (5.5-8.9)              | -0.1 (-1.6 to 0.1)            | -                             | 0.13           |
| Length of hospital stay, days   |                         |                            |                               |                               |                |
| mean (SD)                       | 4.5 (3.6)               | 6.3 (6.2)                  | -1.8 (-3.4 to -0.2)           | -                             | 0.0276         |
| median (IQR)                    | 3.7 (1.9-6.2)           | 4.2 (2.3-8.8)              | -0.5 (-2.1 to 0.2)            | -                             | 0.0871         |
| <b>Asthma + IECOPD combined</b> | 143                     | 140                        |                               |                               |                |
| Antibiotics given               | 118 (82.5%)             | 111 (79.3%)                | 3.2% (-6.0 to 12.4)           | 1.23 (0.68 to 2.24)           | 0.54           |
| Single dose only                | 21/118 (17.8%)          | 6/111 (5.4%)               | 12.4% (4.1 to 20.8)           | 3.79 (1.47 to 9.78)           | 0.0041         |
| <48hrs given                    | 29/118 (24.6%)          | 7/111 (6.3%)               | 18.3% (9.0 to 27.4)           | 4.84 (2.02 to 11.59)          | 0.0002         |
| Duration of antibiotics, days   |                         |                            |                               |                               |                |
| mean (SD)                       | 5.3 (3.4)               | 7.1 (4.5)                  | -1.8 (-2.8 to -0.8)           | -                             | 0.0008         |
| median (IQR)                    | 6.0 (2.2-7.1)           | 6.4 (5.5-7.4)              | -0.4 (-1.4 to -0.1)           | -                             | 0.0352         |
| Length of hospital stay, days   |                         |                            |                               |                               |                |
| mean (SD)                       | 4.0 (3.5)               | 5.4 (5.5)                  | -1.4 (-2.5 to -0.2)           | -                             | 0.0186         |
| median (IQR)                    | 3.1 (1.6-5.4)           | 3.8 (2.0-7.2)              | -0.7 (-1.4 to -0.1)           | -                             | 0.0468         |
| <b>Pneumonia</b>                | 94                      | 98                         |                               |                               |                |
| Antibiotics given               | 92/94 (97.8%)           | 96/98 (98.0%)              | -0.1% (-5.2 to 5.6)           | 0.96 (0.13 to 6.95)           | 1.00           |
| Single dose only                | 3/92 (3.3%)             | 1/96 (1.0%)                | 2.2% (-2.9 to 8.2)            | 3.20 (0.33 to 31.37)          | 0.36           |
| <48hrs given                    | 5/92 (5.4%)             | 4/96 (4.2%)                | 1.3% (-5.5 to 8.4)            | 1.32 (0.34 to 5.08)           | 0.74           |
| Duration of antibiotics, days   |                         |                            |                               |                               |                |
| mean (SD)                       | 9.6 (5.4)               | 9.0 (5.3)                  | 0.7 (-0.9 to 2.2)             | -                             | 0.41           |
| median (IQR)                    | 8.3 (6.6-11.6)          | 7.9 (6.3-10.6)             | 0.4 (-0.3 to 1.5)             | -                             | 0.23           |
| Length of hospital stay, days   |                         |                            |                               |                               |                |
| mean (SD)                       | 7.5 (6.5)               | 7.0 (6.4)                  | 0.5 (-1.4 to 2.4)             | -                             | 0.58           |
| median (IQR)                    | 5.6 (3.1-9.6)           | 5.0 (3.0-8.5)              | 0.5 (-0.7 to 1.6)             | -                             | 0.43           |



*Table S8 continued*

|                               | <b>POCT<br/>(n=360)</b> | <b>Control<br/>(n=354)</b> | <b>Difference<br/>(95%CI)</b> | <b>Odds ratio<br/>(95%CI)</b> | <b>p value</b> |
|-------------------------------|-------------------------|----------------------------|-------------------------------|-------------------------------|----------------|
| <b>ILI/NPLRTI</b>             | 76                      | 69                         |                               |                               |                |
| Antibiotics given             | 53/76 (69.7%)           | 51/69 (73.9%)              | -4.2% (-18.4 to 10.5)         | 0.81 (0.39 to 1.68)           | 0.59           |
| Single dose only              | 6/53 (11.3%)            | 3/51 (5.9%)                | 5.4% (-6.3 to 17.4)           | 2.04 (0.48 to 8.65)           | 0.48           |
| <48hrs given                  | 11/53 (20.8%)           | 9/51 (17.7%)               | 3.1% (-12.2 to 18.2)          | 1.22 (0.46 to 3.26)           | 0.81           |
| Duration of antibiotics, days |                         |                            |                               |                               |                |
| mean (SD)                     | 5.9 (4.5)               | 5.8 (3.2)                  | 0.1 (-1.4 to 1.6)             | -                             | 0.84           |
| median (IQR)                  | 6.4 (4.4-7.4)           | 6.3 (4.4-7.3)              | 0.1 (-0.7 to 0.9)             | -                             | 0.88           |
| Length of hospital stay, days |                         |                            |                               | -                             |                |
| mean (SD)                     | 3.7 (4.1)               | 2.9 (4.3)                  | 0.8 (-0.7 to 2.3)             | -                             | 0.30           |
| median (IQR)                  | 2.2 (1.0-4.4)           | 1.9 (0.9-3.1)              | 0.3 (-0.2 to 1.0)             | -                             | 0.23           |
| <b>Other diagnoses</b>        | 47                      | 47                         |                               |                               |                |
| Antibiotics given             | 38/47 (80.9%)           | 36/47 (76.6%)              | 4.3% (-12.3 to 20.6)          | 1.29 (0.48 to 3.48)           | 0.80           |
| Single dose only              | 1/38 (2.6%)             | 0/36 (0%)                  | 2.6% (-7.3 to 13.5)           | 2.92 (0.12 to 74.1)           | 1.00           |
| <48hrs given                  | 5/38 (13.2%)            | 5/36 (13.9%)               | -0.7% (-15.5 to 17.3)         | 0.94 (0.25 to 3.56)           | 1.00           |
| Duration of antibiotics, days |                         |                            |                               | -                             |                |
| mean (SD)                     | 9.2 (6.4)               | 8.4 (5.6)                  | 0.8 (-2.0 to 3.6)             | -                             | 0.56           |
| median (IQR)                  | 8.1 (6.0-11.3)          | 7.3 (5.5-12.2)             | 0.8 (-1.5 to 2.6)             | -                             | 0.77           |
| Length of hospital stay, days |                         |                            |                               |                               |                |
| mean (SD)                     | 7.0 (8.1)               | 7.4 (6.0)                  | -0.4 (-2.7 to 3.5)            | -                             | 0.79           |
| median (IQR)                  | 3.4 (1.3-7.5)           | 6.0 (2.2 to 10.0)          | -2.6 (-3.3 to 0.6)            | -                             | 0.25           |

All data are given as number (%), n/n (%), mean (SD) or median (IQR). POCT=Point-of-care test group. 95%CI=95% confidence interval. IECOPD=infective exacerbation of COPD. ILI=influenza-like illness. NPLRTI=non-pneumonic lower respiratory tract infection.

**Table S9: Median (interquartile range) values for selected outcomes**

|                                                         | <b>POCT<br/>(n=360)</b> | <b>Control<br/>(n=354)</b> | <b>Difference<br/>(95%CI)</b> | <b>p value</b> |
|---------------------------------------------------------|-------------------------|----------------------------|-------------------------------|----------------|
| Turnaround time of viral testing, hours*                | 1.6 (1.3-3.1)**         | 29.8 (24.7-45.8)†          | -35.6 (-39.0 to -32.2)        | <0.0001        |
| Duration of NAI in influenza negative patients , doses‡ | 1.0 (1.0-2.0)           | 5.0 (3.0-10.0)             | -4.0 (-7.0 to -2.0)           | 0.0003         |
| Time to first dose of NAI, hours‡                       | 6.5 (2.0-11.8)          | 8.5 (0.0-41.5)             | -2.0 (-22.0 to 3.0)           | 0.35           |
| Time to isolation, days‡                                | 0.5 (0.0-1.0)           | 1.0 (1.0-2.0)              | -0.5 (-1.0 to 0.0)            | 0.0149         |
| Time to de-isolations, days‡                            | 1.0 (1.0-1.0)           | 2.0 (1.0-5.0)              | -1.0 (-4.0 to 0.0)            | 0.0025         |

POCT=point of care test group. 95%CI=95% confidence interval.

\*Refer to table 2 for full details

\*\*Assessed 356 patients

†Assessed in the 158 patients tested for viruses by laboratory PCR

‡Refer to table 6 for full details

Figure S1: Distribution of antibiotic duration in patients with asthma

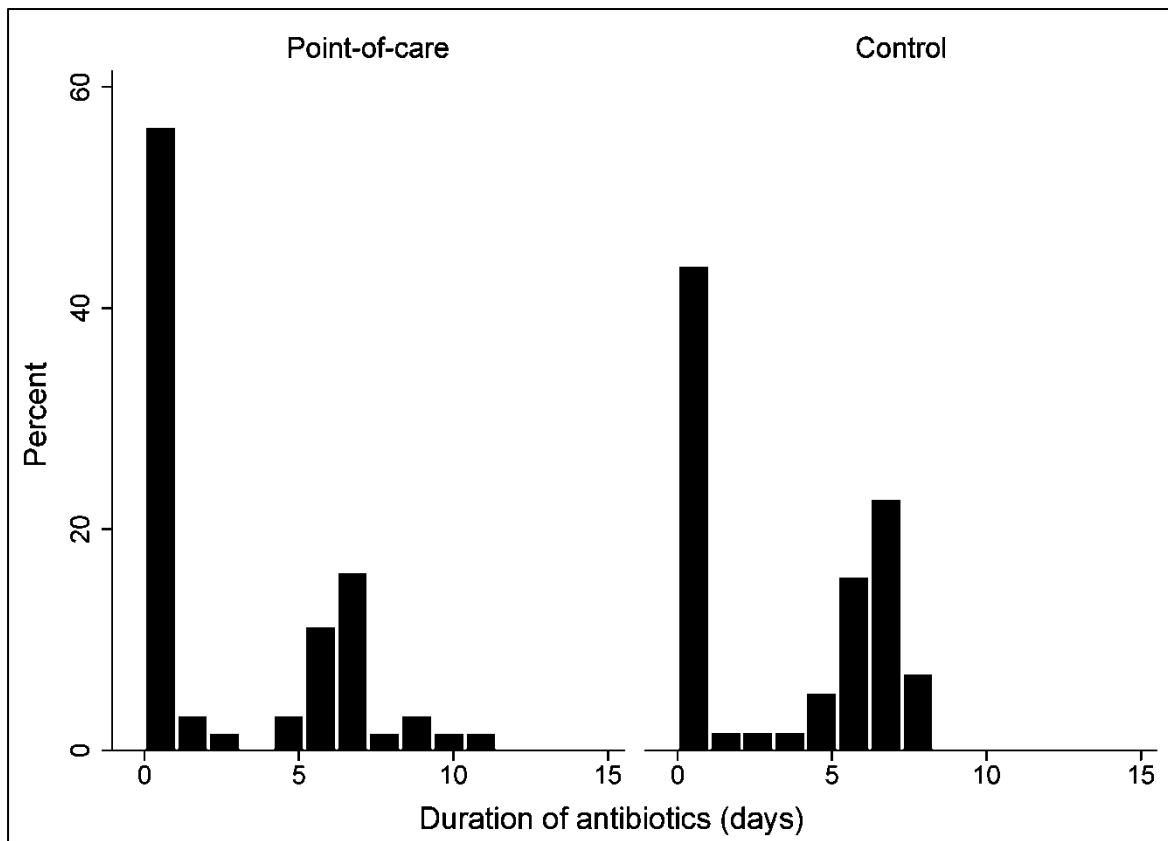

Figure S2: Distribution of antibiotic duration in patients with COPD

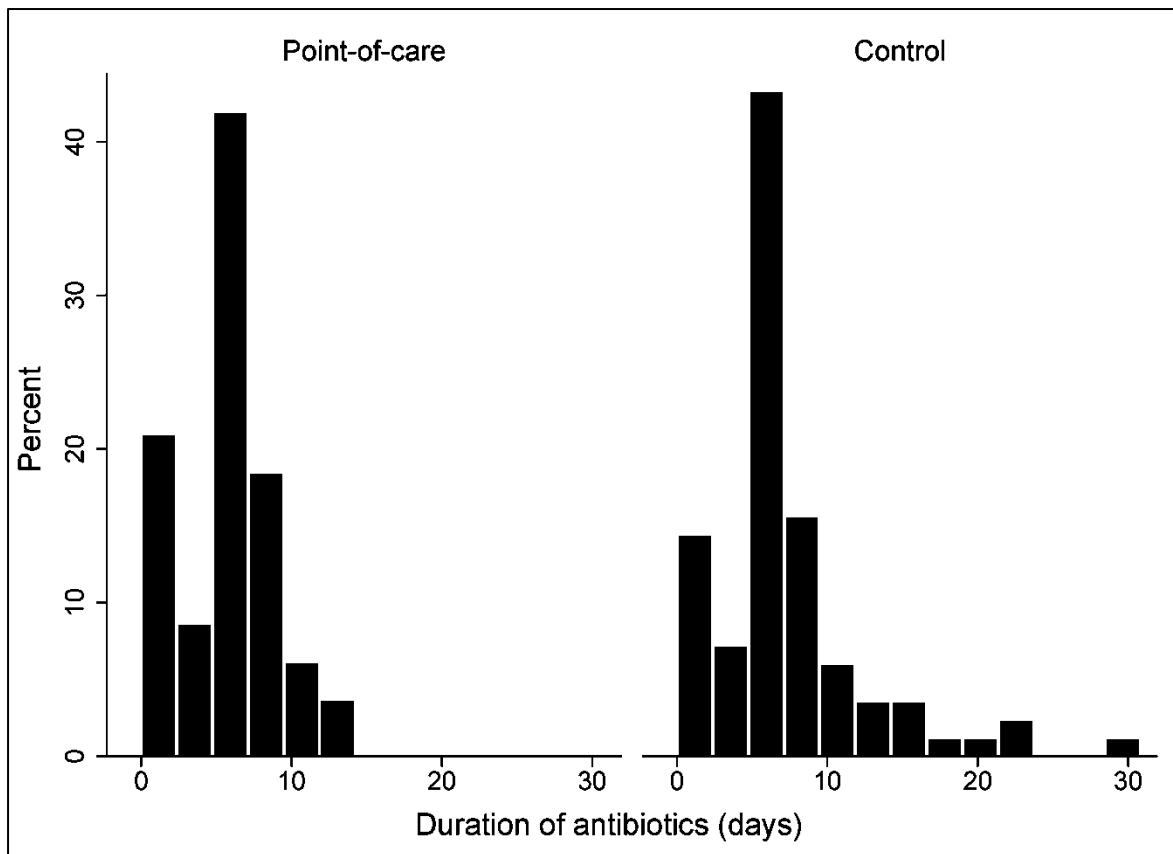

Supplement: mmc1.pdf [file mmc1.pdf]
